1 **Discovery of compounds that inhibit SARS-CoV-2 Mac1-ADP-ribose binding by high-**  
2 **throughput screening**

3  
4 Anu Roy<sup>a,\*</sup>, Yousef M. Alhammad<sup>b,\*</sup>, Peter McDonald<sup>a</sup>, David K. Johnson<sup>c</sup>, Junlin Zhuo<sup>d</sup>, Sarah  
5 Wazir<sup>e</sup>, Dana Ferraris<sup>f</sup>, Lari Lehtiö<sup>e</sup>, Anthony K.L. Leung<sup>d</sup>, Anthony R. Fehr<sup>b,#</sup>

6  
7 \*These authors contributed equally to this work

8  
9 <sup>a</sup>Infectious Disease Assay Development Laboratory/HTS, University of Kansas, Lawrence, Kansas  
10 66047, USA

11 <sup>b</sup>Department of Molecular Biosciences, University of Kansas, Lawrence, Kansas 66045, USA

12 <sup>c</sup>Molecular Graphics and Modeling Laboratory and the Computational Chemical Biology Core,  
13 University of Kansas, Lawrence, Kansas 66047, USA

14 <sup>d</sup>Department of Biochemistry and Molecular Biology, Bloomberg School of Public Health, Johns Hopkins  
15 University, Baltimore, Maryland 21205, USA

16 <sup>e</sup>Faculty of Biochemistry and Molecular Medicine & Biocenter Oulu, University of Oulu, Oulu, Finland

17 <sup>f</sup>McDaniel College Department of Chemistry, 2 College Hill, Westminster, MD <sup>a</sup>McDaniel College,  
18 Westminster, MD 21157

19  
20 #Correspondence: arfehr@ku.edu; Tel.: +1- (785) 864-6626 (K.S.)

21  
22 Running title: Discovery of SARS-CoV-2 Mac1 Inhibitors

23  
24 Keywords: Coronavirus, SARS-CoV-2, macrodomain, ADP-ribose, ADP-ribosylation, high-  
25 throughput screening

26 **ABSTRACT**

27           The emergence of several zoonotic viruses in the last twenty years, especially the  
28 pandemic outbreak of SARS-CoV-2, has exposed a dearth of antiviral drug therapies for viruses  
29 with pandemic potential. Developing a diverse drug portfolio will be critical for our ability to  
30 rapidly respond to novel coronaviruses (CoVs) and other viruses with pandemic potential. Here  
31 we focus on the SARS-CoV-2 conserved macrodomain (Mac1), a small domain of non-structural  
32 protein 3 (nsp3). Mac1 is an ADP-ribosylhydrolase that cleaves mono-ADP-ribose (MAR) from  
33 target proteins, protects the virus from the anti-viral effects of host ADP-ribosyltransferases, and  
34 is critical for the replication and pathogenesis of CoVs. In this study, a luminescent-based high-  
35 throughput assay was used to screen ~38,000 small molecules for those that could inhibit Mac1-  
36 ADP-ribose binding. We identified 5 compounds amongst 3 chemotypes that inhibit SARS-CoV-  
37 2 Mac1-ADP-ribose binding in multiple assays with  $IC_{50}$  values less than  $100\mu M$ , inhibit ADP-  
38 ribosylhydrolase activity, and have evidence of direct Mac1 binding. These chemotypes are  
39 strong candidates for further derivatization into highly effective Mac1 inhibitors.

## 40 INTRODUCTION

41 COVID-19, caused by severe acute respiratory syndrome coronavirus 2 (SARS-CoV-2),  
42 is one of the most disruptive and deadly pandemics in modern times, with greater than 385  
43 million cases and having led to greater than 5.7 million deaths worldwide. SARS-CoV-2 is the  
44 third CoV to emerge into the human population in the last 3 decades, following outbreaks of  
45 SARS-CoV in 2002-2003 and Middle East respiratory syndrome MERS-CoV in 2012. These  
46 outbreaks highlight the potential for CoVs to cross-species barriers and cause severe disease in a  
47 new host. There is a tremendous need to develop broad-spectrum antiviral therapies capable of  
48 targeting a wide range of CoVs to prevent severe disease following zoonotic outbreaks.

49 Coronaviruses encode for 16 highly conserved, non-structural proteins that are processed  
50 from two polyproteins, 1a and 1ab (pp1a and pp1ab) (1). The largest non-structural protein is  
51 non-structural protein 3 (nsp3) that encodes for multiple modular protein domains. Both the  
52 SARS-CoV and the SARS-CoV-2 nsp3 proteins include three tandem macrodomains, Mac1,  
53 Mac2, and Mac3 (2). Mac1 is present in all CoVs, unlike Mac2 and Mac3, and contains a  
54 conserved three-layered  $\alpha/\beta/\alpha$  fold, a common feature amongst all macrodomains. All CoV Mac1  
55 proteins tested have mono-ADP-ribosylhydrolase (ARH) activity, though it remains unclear if  
56 they have significant poly-ARH activity (3-8). In contrast, Mac2 and Mac3 fail to bind ADP-  
57 ribose and instead bind to nucleic acids (9,10). Mac1 homologs are also found in alphaviruses,  
58 Hepatitis E virus, and Rubella virus, indicating that ADP-ribosylation may be a potent anti-viral  
59 post-translational modification (PTM) (11,12). All are members of the larger MacroD-type  
60 macrodomain family, which includes human macrodomains Mdo1 and Mdo2 (13).

61 ADP-ribosylation is a post-translational modification catalyzed by ADP-  
62 ribosyltransferases (ARTs, also known as PARPs) through transferring an ADP-ribose moiety

63 from NAD<sup>+</sup> onto target proteins or nucleic acids (14). ADP-ribose is transferred in as a single  
64 unit as mono-ADP-ribose (MAR), or it is transferred consecutively and covalently attached  
65 through glycosidic bonds to preceding ADP-ribose units to form a poly-ADP-ribose (PAR)  
66 chain. Both mono- and poly-ARTs inhibit virus replication, implicating ADP-ribosylation in the  
67 host-response to infection (15).

68         Several reports have addressed the role of Mac1 on the replication and pathogenesis of  
69 CoVs, mostly using the mutation of a highly conserved asparagine to alanine (N41A-SARS-  
70 CoV). This mutation abolished the MAR-hydrolase activity of SARS-CoV Mac1 (16). This  
71 mutation has minimal effects on CoV replication in transformed cells, but reduces viral load,  
72 leads to enhanced IFN production, and strongly attenuates both murine hepatitis virus (MHV)  
73 and SARS-CoV in mouse models of infection (4,16-18). Murine hepatitis virus strain JHM  
74 (MHV-JHM) Mac1 was also required for efficient replication in primary macrophages, which  
75 could be partially rescued by the PARP inhibitors or siRNA knockdown of PARP12 or PARP14  
76 (19). These data suggest that Mac1's function is to counter PARP-mediated anti-viral ADP-  
77 ribosylation (20). More recently, we have identified mutations in the MHV-JHM Mac1 domain,  
78 predicted to abolish ADP-ribose binding, that resulted in severe replication defects in cell  
79 culture, indicating that for some CoVs Mac1 may be even more important than previously  
80 appreciated (21). Mutations in the alphavirus and HEV macrodomain also have substantial  
81 phenotypic effects on virus replication and pathogenesis (22-26).

82         As viral macrodomains are critical virulence factors, they are unique targets for anti-viral  
83 therapeutics (20). Several studies have reported structures that could potentially bind to the ADP-  
84 ribose binding pocket of SARS-CoV-2 Mac1. While most of these studies were limited to *in*  
85 *silico* studies, a few have tested compound activity in biochemical assays, but have been met

86 with minimal success (27-30). The only compounds identified thus far that inhibit SARS-CoV-2  
87 Mac1 with IC<sub>50</sub> less than 100 μM are Suramin, which inhibited Mac1-ADP-ribose binding in a  
88 FRET assay with an IC<sub>50</sub> of 8.7 μM, and Dasatinib, which inhibited Mac1 mono-ARH activity  
89 with an IC<sub>50</sub> of ~50 μM. Suramin targeted several divergent macrodomains and is known to have  
90 additional targets, and thus is not suitable for further evaluation (30). Dasatinib is not a candidate  
91 for a Mac1 inhibitor as it is toxic to mammalian cells, though it may provide a scaffold for  
92 further inhibitor development. None of the identified compounds have been tested for their  
93 ability to inhibit Mac1 in cell culture or in animal models of disease.

94 Here, we optimized two high-throughput macrodomain-ADP-ribose binding assays, a  
95 previously described luminescent-based AlphaScreen™ assay, and a novel fluorescence  
96 polarization assay (31,32), and used the AlphaScreen™ assay to screen ~38,000 compounds for  
97 their ability to inhibit SARS-CoV-2 Mac1-ADP-ribose binding. We identified 5 compounds  
98 from 3 chemotypes that inhibited ADP-ribose binding by the SARS-CoV-2 Mac1 protein in both  
99 assays, some with IC<sub>50</sub> values as low as 5-10 μM. These compounds also demonstrated some  
100 inhibition of ARH activity and have evidence of direct binding to Mac1. The profiling of the  
101 most potent inhibitor against a panel of virus and human MAR binding and hydrolyzing proteins  
102 revealed the remarkable selectivity of the inhibition of SARS-CoV-2 Mac1. These compounds  
103 represent several series that can be further developed into potent Mac1 inhibitors and potential  
104 therapeutics for SARS-CoV-2 and other CoVs of interest.

105

## 106 **RESULTS and DISCUSSION**

107 **Comparison of viral and human macrodomains in two high-throughput ADP-ribose**  
108 **binding assays.** Here we established two distinct ADP-ribose binding assays for multiple

109 macrodomain proteins (Fig. 1A-C). First, we adopted a previously published AlphaScreen™  
110 (AS) assay, where a short peptide was modified at a leucine residue with ADP-ribose through an  
111 amino-oxyacetic acid linkage, and at a second leucine residue with biotin (Fig. 1A) (32).  
112 Streptavidin donor beads and Ni<sup>2+</sup> acceptor beads induce a light signal if the His-tagged Mac1  
113 protein interacts with the biotinylated peptide (Fig. 1B). We also developed a fluorescent  
114 polarization (FP) assay as an orthogonal assay to evaluate interactions of macrodomains with  
115 ADP-ribosylated peptide. This assay used the same peptide but with fluorescein attached instead  
116 of biotin and measures polarization of the fluorescent signal (Fig. 1C). We then tested 4 separate  
117 macrodomains for their ability to bind to these peptides, the human macrodomain Mdo2, and  
118 Mac1 from SARS-CoV, MERS-CoV, and SARS-CoV-2. All 4 macrodomains bound to the  
119 ADP-ribosylated control peptides better than to non-ADP-ribosylated peptides (Fig. 1D,G). The  
120 AS assay had an especially strong signal-to-background ratio, ranging from  $\sim 0.75\text{-}2 \times 10^3$ . To  
121 further study the binding of Mac1 proteins to AS and FP peptides, we evaluated binding in a  
122 dose-dependent assay. Of these four proteins, the human MDO2 demonstrated the highest  
123 affinity in both assays, with a  $K_D$  of  $1.1 \pm 0.3 \mu\text{M}$  in the FP assay and reached a maximum signal  
124 in the AS assay at 40 nM (Fig. 1E,H). The SARS-CoV-2 Mac1 had a  $K_D$  of  $3.4 \pm 0.4 \mu\text{M}$  in the  
125 FP assay and reached a maximum signal in the AS assay at  $0.625 \mu\text{M}$ , while the SARS-CoV and  
126 MERS-CoV Mac1 both reached their maximum signal in the AS assay at  $\sim 1.25\text{-}2.5 \mu\text{M}$  (AS)  
127 and had  $K_D$ 's of  $7.7 \pm 1.3 \mu\text{M}$  and  $19.9 \pm 3.3 \mu\text{M}$  in the FP assay, respectively (Fig. 1F,I).

128         Next, we tested the ability of free ADP-ribose to inhibit the binding of Mac1 to the ADP-  
129 ribosylated peptide. For these displacement assays, the amount of beads, peptide, and Mac1  
130 protein amounts to be used were optimized to obtain a robust signal while limiting the amount of  
131 reagents used for screening purposes (see Methods). The addition of free ADP-ribose, but not

132 ATP, into the AS and FP assays inhibited human macrodomain and CoV Mac1 binding to the  
133 ADP-ribosylated peptides, confirming that these assays can be used to identify macrodomain  
134 binding inhibitors (Fig. 2). IC<sub>50</sub> values for free ADP-ribose ranged between 0.24 μM with SARS-  
135 CoV Mac1 to 1.5 μM with SARS-CoV-2 using the free ADP-ribose in the AS assay (Fig. 2A).  
136 Similar results, albeit higher IC<sub>50</sub> values were observed in the FP assay, likely because of higher  
137 amount of Mac1 used in this assay (4 μM vs 250 nM), with IC<sub>50</sub> values ranging from 2.3 μM to  
138 9.74 μM (Fig. 2B).

139  
140 **High-throughput screening (HTS) for SARS-CoV-2 Mac1 inhibitors.** We next performed a  
141 small pilot screen of ~ 2,000 compounds from the Maybridge Mini Library of drug-like scaffolds  
142 at 10 μM using both AS and FP assays (Fig. 3A-B). We identified 39 compounds that  
143 significantly inhibited Mac1-ADP-ribose binding at >3 standard deviations (3SD) plus the plate  
144 median (Fig. 3A-B). After performing dose-response curves we found that two compounds  
145 inhibited binding in both assays (Fig. 4A). We then tested these compounds in a counter screen,  
146 which is also an AS assay that utilizes a biotinylated-His peptide that gives off a strong signal  
147 with the addition of streptavidin donor and nickel acceptor beads. These two compounds did not  
148 affect the signal from our counter screen indicating that they do not intrinsically inhibit the assay.  
149 After this initial validation of our screen, three additional libraries were chosen to include a total  
150 number of 35,863 compounds from the Analyticon, 3D BioDiversity, and Peptidomimetics  
151 libraries (Fig. 3A). We chose the AS assay as our primary HTS assay, as the average Z' score for  
152 the AS was higher than the Z' score from the FP assay in our original screen (0.82 vs 0.67). In  
153 this larger screen, the average Z' was 0.89±0.05, indicating a strong separation between positive  
154 and negative controls (Fig. 3C). Using the same hit criteria described above for each individual

155 library, we identified 406 hits resulting in a 1% hit rate (Fig. 3D). Of note, the Analyticon library  
156 produced a lot of non-specific inhibitors, indicating a lot of these compounds likely inhibit the  
157 assays themselves (Fig. 3B). We next performed dose-response (10-40  $\mu$ M) curves of these 406  
158 compounds in our primary (AS), orthogonal (FP), and counter screen (Bn-His<sub>6</sub>) assays (Fig. 3).  
159 From the 406 original hits, 26 compounds were identified that inhibited SARS-CoV-2 Mac1-  
160 ADP-ribose binding in the AS assay in a dose-dependent fashion, and 6 compounds were  
161 identified that inhibited Mac1 binding in both AS and FP assays (Fig. 3D). Of these 32 hit  
162 compounds, we re-purchased 17 of them, excluding 15 based on several selection criteria,  
163 including substantial inhibition of the counter screen, high IC<sub>50</sub> values in the AlphaScreen, pan-  
164 assay interference compounds, and compound availability (Fig. 3D). The remaining 17  
165 compounds along with 4 analogs were repurchased or resynthesized (see Methods).

166 Re-purchased compounds were evaluated in dose-response assays against both SARS-  
167 CoV-2 Mac1 and human MDO2 protein. Our cutoff criteria included: *i*) compound must inhibit  
168 both primary and orthogonal assays with at least 75% inhibition in AS assay and at or near 50%  
169 inhibition in the FP assay, and *ii*) less than 30% inhibition of the Bn-His<sub>6</sub> counter screen. Among  
170 the 17 selected and the 4 analogs compounds, six compounds inhibited ADP-ribose binding of  
171 SARS-CoV-2 Mac1 in both AS and FP assays with no substantial inhibition of the Bn-His<sub>6</sub>  
172 counter screen. These were compounds **1,2,6,7,10**, and **11** (Table 1). IC<sub>50</sub> values ranged from 6.2  
173  $\mu$ M to 112.2  $\mu$ M in AS assay and 7.3  $\mu$ M to 159.4  $\mu$ M in FP assay (Table 1, Fig. 4). Compounds  
174 **1**, **10**, and **11** also had some inhibitory activity against the MERS-CoV Mac1 protein, though the  
175 inhibition of MERS-CoV Mac1 was lower than the inhibition demonstrated against SARS-CoV-  
176 2 (Table 1). In addition, only compound **2** inhibited MDO2, indicating that these compounds  
177 were broadly specific for viral macrodomains.



178

179 **Selected compounds demonstrate evidence of SARS-CoV-2 Mac 1 binding.** Next, we set out  
180 to test the hypothesis that these compounds inhibit Mac1-ADP-ribose by binding to Mac1, and  
181 not other components of the assay, such as the peptide. To test for Mac1 binding, we used a  
182 differential scanning fluorimetry (DSF) assay as previously described (8) and tested our top 6 hit  
183 compounds (Fig. 5, S1) and compounds **8** and **9**, as they are analogs of **6** and **7** (Fig. S2). In this  
184 assay, compound binding to Mac1 should increase the melting temperature of Mac1. The  
185 addition of free ADP-ribose, which binds to Mac1, showed a dose-dependent increase of  
186 approximately 4°C in the melting temperature of Mac1, while the negative control, ATP, had no  
187 effect, as previously demonstrated (8). **1**, **6**, **7**, **10**, and **11** showed dose-dependent shifts in the  
188 melting temperature of Mac1 ranging from 0.2 - 1.5°C, providing strong evidence that these  
189 compounds bind to Mac1, albeit not with the same affinity as ADP-ribose. On the other hand,  
190 compound **2** resulted in highly irregular thermal shift curves, indicating that this compound may  
191 not be a true Mac1 binder (Fig. 5, S1). These results provide evidence that 5 of our 6 hit  
192 compounds (**1**, **6**, **7**, **10**, and **11**) directly bind to SARS-CoV-2 Mac1.

193

194 **Hit compounds inhibit ADP-ribosylhydrolase activity *in vitro*.** SARS-CoV-2 Mac1 is a  
195 mono-ADP-ribosylhydrolase that removes mono-ADP-ribose from target proteins (8). Next, we  
196 examined the ability of some of our top 5 hit compounds to inhibit the enzymatic activity of  
197 SARS-CoV-2 Mac1 using two distinct assays. The first approach was a gel-based Mac1 ADP-  
198 ribosylhydrolase assay where we tested each compound against the SARS-CoV-2 Mac1 protein  
199 (8). Compound **1** tended to precipitate in these assays at higher concentrations, and so we used  
200 lower concentrations for this compound than others. Compounds **1**, **6**, and **7** exhibited a dose-

201 dependent inhibition of Mac1 ADP-ribosylhydrolase activity (Fig. 6A). We were unable to detect  
202 any significant inhibition with **10** and **11** in this assay.

203 Next, we utilized a recently published high-throughput luminescence-based ADP-  
204 ribosylhydrolyase assay (33). Here we found that **1**, **6**, **7**, **10** and **11** all showed dose-dependent  
205 inhibition of ADP-ribosylhydrolase activity (Fig. 6B). **6** was clearly the most efficient inhibitor,  
206 as it had a peak of ~60% inhibition, similar to Dasatinib which we previously identified in a  
207 separate HTS (33). In contrast to the gel-based assay, **10** and **11** did inhibit ADP-  
208 ribosylhydrolase activity in this assay, likely reflecting the increased sensitivity of this assay  
209 compared to the gel-based assay. These results indicate that the identified Mac1 inhibitors block  
210 Mac1 binding and Mac1 enzymatic activity.

211  
212 **Selectivity Profiling.** As compound **6** inhibited both Mac1 ADP-ribose binding and hydrolysis  
213 activity, and showed the strongest evidence of direct Mac1 binding, we tested its ability to inhibit  
214 16 different macrodomains using a recently developed FRET-based assay (30). Again, **6**  
215 demonstrated dose-dependent inhibition of Mac1-ADP-ribose binding in this assay, consistent  
216 with our AS results but with a slightly higher IC<sub>50</sub> of 45.0 ± 10.9 μM (Fig. 7A). Remarkably,  
217 when tested again 16 different human and viral macrodomains in this assay, **6** only inhibited  
218 SARS-CoV-2 Mac1, having only minimal levels in inhibition of all other macrodomain proteins,  
219 including other CoV macrodomains (Fig. 7B), which is in agreement with the selectivity  
220 observed in AS (Table 1). These results indicate that this compound is highly selective for the  
221 SARS-CoV-2 Mac1 protein.

222

223 **Structure activity relationship (SAR).** The top 5 compounds could be separated into 3  
224 chemotypes based on their structures. To analyze the involved residues and type of connection  
225 between selected hit compound and Mac1, we used computational docking analysis to get an  
226 initial structure activity relationship (SAR) by predicting poses of compounds in Mac1  
227 structures. In addition to our 5 hit compounds, we also docked compounds **8** and **9** as they are  
228 analogs of **6** and **7** and could give further insight into SAR, even though we either detected  
229 minimal or no direct Mac1 binding by these compounds. These seven compounds were docked  
230 against the ADP-ribose bound structure of SARS-CoV-2 Mac1 (PDB 6WOJ) as well as three apo  
231 structures of Mac1 were used (PDB 7KR0, 7KR1, 6WEY). Docking and glide emodel scores  
232 were calculated for each compound against all four structures and the best structure was chosen  
233 based on these scores (Table S1). Analog compounds **6**, **7**, **8**, and **9** were assessed both based on  
234 score and visual inspection, and were re-docked using a core constraint to a high scoring,  
235 intuitive pose of compound **7**. All top scoring poses were subsequently minimized using Prime,  
236 allowing flexibility within 5 Å of the ligand. Compound **1** was its own chemotype but has a  
237 sulfonohydrazide that is also found in a compound identified in a previous screen for Mac1  
238 compounds (34). It also has a thienopyrimidine that is similar to the pyrrolopyrimidine found in  
239 of the compounds identified in the fragment screen by Schuller et al (31). It makes a hydrogen  
240 bond with a backbone amine of D22, pie-stacking interactions with F156, and extends with a  
241 benzene ring into the distal ribose pocket inserting in between the GGG and GIF loops (Fig. 8A).  
242 Compounds **10** and **11** are close analogs with a single difference of positioning in the  
243 bromobenzoyl moiety on the piperidine ring (Fig. 4C). These compounds had similar activity  
244 across the board in our assays, making it difficult to analyze their SAR. While they docked into  
245 the binding pocket, these docking poses only indicate a single hydrogen bond with the backbone

246 amino of D22. In contrast, compounds **6**, **7**, **8**, and **9** are close analogs of each other and have a  
247 wide-range of inhibitory and binding activity. IC<sub>50</sub> values for these compounds range from 10 to  
248 several hundred μM (Table 1). Direct binding also varied substantially, with T<sub>m</sub>'s ranging from  
249 ~1.7 °C (**6**) to undetectable binding (**8**). These compounds all have the same base structure,  
250 including a beta-alanine core substituted with a N-benzyl or N-chlorobenzyl group, a methoxy  
251 benzoyl group and a piperazine amide. The main difference between **6** and its analogs are the  
252 addition of a methoxy group on the benzoyl group (**7**), the loss of a chlorine (**8**), and a missing  
253 methoxy group (**9**). Each of these changes reduces the activity of this series indicating that *i*) the  
254 orientation of the methoxy groups on **6** is likely important for its increased activity, *ii*)  
255 reorienting **7** to accommodate the 4-methoxy group likely decreases activity due to the disruption  
256 of multiple interactions, and *iii*) the chlorine likely makes a critical halogen bond with a  
257 backbone amino group of L126 in the binding pocket.

258 In conclusion, we developed multiple high-throughput ADP-ribose binding assays and  
259 performed HTS to identify high-quality Mac1 inhibitors. We followed these screens with several  
260 additional assays to measure their ability to inhibit ADP-ribosylhydrolase activity and their direct  
261 binding to Mac1. We have identified 5 compounds that inhibit both the primary and orthogonal  
262 assays without inhibiting the counter screen and demonstrate dose-dependent inhibition of Mac1  
263 enzymatic activity. Compounds **1** and **6** are particularly effective with IC<sub>50</sub> values of ~10 μM in  
264 the AS assay, along with thermal shifts and docking poses that indicate direct binding to Mac1.  
265 Compound **6** shows excellent selectivity towards SARS-CoV-2 over the human macrodomains  
266 guiding further development of the compound. We expect that these compounds could be  
267 utilized for further derivatization and optimization into more potent Mac1 inhibitors.

## 268 **METHODS**

### 269 **Reagents**

270 All plasmids and proteins used were expressed and purified as previously described  
271 (30,35-37). All compounds were repurchased from MolPort except for compounds **6** and **10**,  
272 which were repurchased from ChemDiv. After reordering once, compounds **10** and **11** became  
273 unavailable and thus were resynthesized according to the literature (38). ADP-ribosylated  
274 peptides were purchased from Cambridge peptides.

### 275 **Differential Scanning Fluorimetry (DSF)**

276 Thermal shift assay with DSF involved use of LightCycler® 480 Instrument (Roche  
277 Diagnostics). In total, a 15  $\mu$ L mixture containing 8X SYPRO Orange (Invitrogen), and 10  $\mu$ M  
278 macrodomain protein in buffer containing 20 mM HEPES, NaOH, pH 7.5 and various  
279 concentrations of ADP-ribose or hit compounds were mixed on ice in 384-well PCR plate  
280 (Roche). Fluorescent signals were measured from 25 to 95  $^{\circ}$ C in 0.2  $^{\circ}$ C/30/Sec steps (excitation,  
281 470-505 nm; detection, 540-700 nm). The main measurements were carried out in triplicate. Data  
282 evaluation and  $T_m$  determination involved use of the Roche LightCycler® 480 Protein Melting  
283 Analysis software, and data fitting calculations involved the use of single site binding curve  
284 analysis on GraphPad Prism. The thermal shift ( $\Delta T_m$ ) was calculated by subtracting the  $T_m$   
285 values of the DMSO from the  $T_m$  values of compounds.

### 286 **AlphaScreen (AS) Assay**

287 The AlphaScreen reactions were carried out in 384-well plates (Alphaplate, PerkinElmer,  
288 Waltham, MA) in a total volume of 40  $\mu$ L in buffer containing 25 mM HEPES (pH 7.4), 100  
289 mM NaCl, 0.5 mM TCEP, 0.1% BSA, and 0.05% CHAPS. All reagents were prepared as 4X  
290 stocks and 10  $\mu$ L volume of each reagent was added to a final volume of 40  $\mu$ L. All compounds

291 were transferred acoustically using ECHO 555 (Beckman Inc) and preincubated after mixing  
292 with purified His-tagged macrodomain protein (250 nM) for 30 min at RT, followed by addition  
293 of a 10 amino acid biotinylated and ADP-ribosylated peptide [ARTK(Bio)QTARK(Aoa-  
294 RADP)S] (Cambridge peptides) (625 nM). After 1h incubation at RT, streptavidin-coated donor  
295 beads (7.5  $\mu$ g/mL) and nickel chelate acceptor beads (7.5  $\mu$ g/mL); (PerkinElmer AlphaScreen  
296 Histidine Detection Kit) were added under low light conditions, and plates were shaken at 400  
297 rpm for 60 min at RT protected from light. Plates were kept covered and protected from light at  
298 all steps and read on BioTek plate reader using an AlphaScreen 680 excitation/570 emission  
299 filter set. For counter screening of the compounds, 25 nM biotinylated and hexahistidine-tagged  
300 linker peptide (Bn-His<sub>6</sub>) (PerkinElmer) was added to the compounds, followed by addition of  
301 beads as described above.

### 302 **Fluorescence Polarization (FP) Assay**

303 The FP assay was performed in buffer containing 25 mM Tris pH7.5, NaCl 50 mM,  
304 0.025% TritonX-100. All reagents were prepared as 2X stocks and 10  $\mu$ L volume of each reagent  
305 was added to a final volume of 20  $\mu$ L. Compounds were preincubated with His-Macrodomain  
306 proteins (4  $\mu$ M) for 30', RT in black 384 well plates (Corning 3575 plates), followed by addition  
307 of 50 nM of fluorescein labeled ADP-ribosylated peptide [5Flu-ARTKQTARK(Aoa-RADP)S].  
308 After mixing for a minute, the plate was incubated at 25°C, protected from light and fluorescence  
309 polarization was read after 30 minutes, 1h and 2h using a plate reader.

### 310 **Gel-based Inhibition of Mono-ADP-ribosylhydrolase activity (de-MARylation)**

311 PARP10-CD protein was auto-MARylated through incubation for 20 minutes at 37°C  
312 with 1 mM final concentration of  $\beta$ -Nicotinamide Adenine Dinucleotide ( $\beta$  NAD<sup>+</sup>) (Millipore-  
313 Sigma) in a reaction buffer (50 mM HEPES, 150 mM NaCl, 0.2 mM DTT, and 0.02% NP-40).

314 MARYlated PARP10 was aliquoted and stored at -80°C. To test the ability of identified  
315 compounds for their ability to inhibit MARYlation activity of Mac1, we first incubated each  
316 compound with purified SARS-CoV-2 Mac1 in the reaction buffer (50 mM HEPES, 150 mM  
317 NaCl, 0.2 mM DTT, and 0.02% NP-40) at 37°C for 30 min. Then, MARYlated PARP10-CD was  
318 added to this mixture solution and further incubated for 30 min at 37°C. The reaction was  
319 stopped with addition of 2X Laemmli sample buffer containing 10%  $\beta$ -mercaptoethanol. Protein  
320 samples were heated at 95°C for 5 minutes before loading and separated onto SDS-PAGE  
321 cassette (Thermo Fisher Scientific Bolt™ 4-12% Bis-Tris Plus Gels) in MES running buffer. For  
322 immunoblotting, the separated proteins were transferred onto polyvinylidene difluoride (PVDF)  
323 membrane using iBlot™ 2 Dry Blotting System (ThermoFisher Scientific). The blot was blocked  
324 with 5% skim milk in 1xPBS and probed with the anti-mono-ADP-ribose binding  
325 reagent/antibody MABE1076 ( $\alpha$ -MAR), and anti-GST tag monoclonal antibody MA4-004  
326 (ThermoFisher Scientific). The primary antibodies were detected with secondary anti-rabbit and  
327 anti-mouse antibodies (LI-COR Biosciences). All immunoblots were visualized using  
328 Odyssey® CLx Imaging System (LI-COR Biosciences). The images were quantitated using the  
329 LI-COR Image Studio software.

### 330 **ADP-ribosylhydrolase assay**

331 The recently published assay, ADPr-Glo, was used to examine the impact of our top hit  
332 compounds on SARS-CoV-2 enzymatic activity (33). Briefly, the compounds were preincubated  
333 with SARS-CoV-2 Mac1 (2 nM) and NudF (125 nM) at ambient temperature for 30 min prior to  
334 the addition of MARYlated PARP-10 derived substrate. The substrate (20  $\mu$ M) was then  
335 incubated with the SARS-CoV-2 Mac1 and NudF at ambient temperature for 30 min. The  
336 reaction products were measured with AMP-Glo. Reactions without macrodomains were

337 performed in parallel as a negative control. Luminescence signal was converted to AMP  
338 concentration via interpolation from an AMP standard curve. Data plotted are AMP generated by  
339 the macrodomain and NudF, subtracted by AMP generated from NudF alone. Inhibition  
340 percentages were calculated and non-linear regression analysis was performed in GraphPad  
341 Prism.

### 342 **A FRET based binding assay and inhibitor profiling**

343 FRET method was utilized for the profiling of MCD-628 a panel of human and viral  
344 macrodomains to determine their specificity (30,36). The assay is based on the site-specific  
345 introduction of cysteine-linked mono-ADP-ribose to the C-terminal G $\alpha$ i peptide (GAP) by  
346 Pertussis toxin subunit1 (PtxS1) fused to YFP. To generate the FRET signal ADP-ribosyl binders  
347 were fused to CFP. Samples were prepared in the assay buffer (for most binders; 10 mM Bis-  
348 Tris propane pH 7.0, 3 % (w/v) PEG 20,000, 0.01 % (v/v) Triton X-100 and 0.5 mM TCEP), (for  
349 TARG1; 10 mM Bis-Tris propane pH 7.0, 150 mM NaCl, 0.01 % (v/v) Triton X-100 and 0.5  
350 mM TCEP), (for PARG; 10 mM Bis-Tris propane pH 7.0, 25 mM NaCl, 0.01 % (v/v) Triton X-  
351 100 and 0.5 mM TCEP) in a 384-well black polypropylene flat-bottom plates (Greiner, Bio-one)  
352 with 10  $\mu$ L reaction volume per well. The reactions consisted of 1  $\mu$ M CFP-fused binders and 5  
353  $\mu$ M MARYlated YFP-GAP. Reactions were excited at 410 nm (20 nm bandwidth), while the  
354 emission signal was measured at 477 nm (10 nm bandwidth) and 527 nm (10 nm bandwidth).  
355 Afterwards, blank was deducted from the individual values and the radiometric FRET (rFRET)  
356 was calculated by dividing the fluorescence intensities at 527 nm by 477 nm. Compound was  
357 dispensed with Echo acoustic liquid dispenser (Labcyte, Sunnyvale, CA). Dispensing of larger  
358 volumes of the solutions was carried out by using Microfluidic Liquid Handler (MANTIS<sup>®</sup>,



359 Formulatrix, Bedford, MA, USA). Measurements were taken with Tecan Infinite M1000 pro plate  
360 reader.

### 361 **Computational modeling**

362 Hit compounds were docked into the ADPr-bound (6WOJ), 3 unique unbound  
363 conformations (7KR0, 7KR1, 6WEY) and two small molecule bound (5RSG, 5RTT) structures  
364 of SARS-CoV-2 Mac1 (35,39,40). The proteins and ligands were prepared using Schrodinger  
365 Maestro and were subsequently docked using Glide with XP precision, analog compounds **6**, **7**,  
366 **8**, and **9** were re-docked using a core constraint to a high scoring, intuitive pose of compound **7**,  
367 and high scoring poses were subjected to a Prime MM-GBSA minimization, allowing flexibility  
368 for any residue within 5 Å of the ligand (41-46).

369 **ACKNOWLEDGEMENTS**

370 ARF would like to the the KU Synthetic Chemistry Core facility for help in ordering and  
371 confirming several of these compounds. DVF would like to acknowledge McDaniel College  
372 Student-Faculty Summer Research Fund, the Jean Richards Fund, the Schofield fund, and the  
373 Scott and Natalie Dahne fund. DVF would also like to acknowledge Mr. Kristopher Mason and  
374 Vaccitech for the use of their mass spectrometer. LL would like to acknowledge the use of the  
375 facilities of the Biocenter Oulu Structural Biology core facility, a member of Biocenter Finland,  
376 Instruct-ERIC Centre Finland and FINStruct. This research was funded by National Institutes of  
377 Health (NIH) grants P20 GM113117, P30GM110761, a CTSA grant from NCATS awarded to  
378 the University of Kansas for Frontiers: University of Kansas Clinical and Translational Science  
379 Institute (#UL1TR002366), and University of Kansas start-up funds to ARF, and by Sidrid  
380 Jusélius foundation grant to LL, and Johns Hopkins Bloomberg School of Public Health  
381 Discretionary Fund to AKLL. The contents are solely the responsibility of the authors and do not  
382 necessarily represent the official views of the NIH or NCATS.

## 383 REFERENCES

- 384 1. Fehr, A. R., and Perlman, S. (2015) Coronaviruses: An Overview of Their Replication  
385 and Pathogenesis. in *Coronaviruses* (Maier, H. J., Bickerton, E., and Britton, P. eds.),  
386 Springer New York. pp 1-23
- 387 2. Srinivasan, S., Cui, H., Gao, Z., Liu, M., Lu, S., Mkandawire, W., Narykov, O., Sun, M.,  
388 and Korkin, D. (2020) Structural Genomics of SARS-CoV-2 Indicates Evolutionary  
389 Conserved Functional Regions of Viral Proteins. *Viruses* **12**, 360
- 390 3. Egloff, M. P., Malet, H., Putics, A., Heinonen, M., Dutartre, H., Frangeul, A., Gruez, A.,  
391 Campanacci, V., Cambillau, C., Ziebuhr, J., Ahola, T., and Canard, B. (2006) Structural  
392 and functional basis for ADP-ribose and poly(ADP-ribose) binding by viral macro  
393 domains. *J Virol* **80**, 8493-8502
- 394 4. Putics, A., Filipowicz, W., Hall, J., Gorbalenya, A. E., and Ziebuhr, J. (2005) ADP-  
395 ribose-1"-monophosphatase: a conserved coronavirus enzyme that is dispensable for viral  
396 replication in tissue culture. *J Virol* **79**, 12721-12731
- 397 5. Saikatendu, K. S., Joseph, J. S., Subramanian, V., Clayton, T., Griffith, M., Moy, K.,  
398 Velasquez, J., Neuman, B. W., Buchmeier, M. J., Stevens, R. C., and Kuhn, P. (2005)  
399 Structural basis of severe acute respiratory syndrome coronavirus ADP-ribose-1"-  
400 phosphate dephosphorylation by a conserved domain of nsP3. *Structure* **13**, 1665-1675
- 401 6. Cho, C. C., Lin, M. H., Chuang, C. Y., and Hsu, C. H. (2016) Macro Domain from  
402 Middle East Respiratory Syndrome Coronavirus (MERS-CoV) Is an Efficient ADP-  
403 ribose Binding Module: CRYSTAL STRUCTURE AND BIOCHEMICAL STUDIES. *J*  
404 *Biol Chem* **291**, 4894-4902
- 405 7. Xu, Y. Y., Cong, L., Chen, C., Wei, L., Zhao, Q., Xu, X. L., Ma, Y. L., Bartlam, M., and  
406 Rao, Z. H. (2009) Crystal Structures of Two Coronavirus ADP-Ribose-1 "-  
407 Monophosphatases and Their Complexes with ADP-Ribose: a Systematic Structural  
408 Analysis of the Viral ADRP Domain. *Journal of Virology* **83**, 1083-1092
- 409 8. Alhammad, Y. M. O., Kashipathy, M. M., Roy, A., Gagne, J. P., McDonald, P., Gao, P.,  
410 Nonfoux, L., Battaile, K. P., Johnson, D. K., Holmstrom, E. D., Poirier, G. G., Lovell, S.,  
411 and Fehr, A. R. (2021) The SARS-CoV-2 Conserved Macrodomein Is a Mono-ADP-  
412 Ribosylhydrolase. *J. Virol.* **95**, e01969-01920
- 413 9. Tan, J., Vornrhein, C., Smart, O. S., Bricogne, G., Bollati, M., Kusov, Y., Hansen, G.,  
414 Mesters, J. R., Schmidt, C. L., and Hilgenfeld, R. (2009) The SARS-Unique Domain  
415 (SUD) of SARS Coronavirus Contains Two Macrodomeins That Bind G-Quadruplexes.  
416 *PLoS Path.* **5**, e1000428
- 417 10. Chatterjee, A., Johnson, M. A., Serrano, P., Pedrini, B., Joseph, J. S., Neuman, B. W.,  
418 Saikatendu, K., Buchmeier, M. J., Kuhn, P., and Wüthrich, K. (2009) Nuclear magnetic  
419 resonance structure shows that the severe acute respiratory syndrome coronavirus-unique  
420 domain contains a macrodomein fold. *Journal of virology* **83**, 1823-1836
- 421 11. Makrynitsa, G. I., Ntonti, D., Marousis, K. D., Birkou, M., Matsoukas, M. T., Asami, S.,  
422 Bentrop, D., Papageorgiou, N., Canard, B., Coutard, B., and Spyroulias, G. A. (2019)  
423 Conformational plasticity of the VEEV macro domein is important for binding of ADP-  
424 ribose. *J Struct Biol* **206**, 119-127
- 425 12. Malet, H., Coutard, B., Jamal, S., Dutartre, H., Papageorgiou, N., Neuvonen, M., Ahola,  
426 T., Forrester, N., Gould, E. A., Lafitte, D., Ferron, F., Lescar, J., Gorbalenya, A. E., de  
427 Lamballerie, X., and Canard, B. (2009) The crystal structures of Chikungunya and

- 428 Venezuelan equine encephalitis virus nsP3 macro domains define a conserved adenosine  
429 binding pocket. *J Virol* **83**, 6534-6545
- 430 13. Rack, J. G., Perina, D., and Ahel, I. (2016) Macrod domains: Structure, Function,  
431 Evolution, and Catalytic Activities. *Annu Rev Biochem* **85**, 431-454
- 432 14. Kim, D. S., Challa, S., Jones, A., and Kraus, W. L. (2020) PARPs and ADP-ribosylation  
433 in RNA biology: from RNA expression and processing to protein translation and  
434 proteostasis. *Genes Dev.* **34**, 302-320
- 435 15. Fehr, A. R., Singh, S. A., Kerr, C. M., Mukai, S., Higashi, H., and Aikawa, M. (2020)  
436 The impact of PARPs and ADP-ribosylation on inflammation and host-pathogen  
437 interactions. *Genes Dev* **34**, 341-359
- 438 16. Fehr, A. R., Channappanavar, R., Jankevicius, G., Fett, C., Zhao, J., Athmer, J.,  
439 Meyerholz, D. K., Ahel, I., and Perlman, S. (2016) The Conserved Coronavirus  
440 Macrodomain Promotes Virulence and Suppresses the Innate Immune Response during  
441 Severe Acute Respiratory Syndrome Coronavirus Infection. *mBio* **7**, e01721-01716
- 442 17. Eriksson, K. K., Cervantes-Barragan, L., Ludewig, B., and Thiel, V. (2008) Mouse  
443 hepatitis virus liver pathology is dependent on ADP-ribose-1"-phosphatase, a viral  
444 function conserved in the alpha-like supergroup. *J Virol* **82**, 12325-12334
- 445 18. Fehr, A. R., Athmer, J., Channappanavar, R., Phillips, J. M., Meyerholz, D. K., and  
446 Perlman, S. (2015) The nsp3 macrodomain promotes virulence in mice with coronavirus-  
447 induced encephalitis. *J Virol* **89**, 1523-1536
- 448 19. Grunewald, M. E., Chen, Y., Kuny, C., Maejima, T., Lease, R., Ferraris, D., Aikawa, M.,  
449 Sullivan, C. S., Perlman, S., and Fehr, A. R. (2019) The coronavirus macrodomain is  
450 required to prevent PARP-mediated inhibition of virus replication and enhancement of  
451 IFN expression. *PLoS Pathog* **15**, e1007756
- 452 20. Alhammad, Y. M. O., and Fehr, A. R. (2020) The Viral Macrodomain Counters Host  
453 Antiviral ADP-Ribosylation. *Viruses* **12**, 384
- 454 21. Voth, L. S., O'Connor, J. J., Kerr, C. M., Doerger, E., Schwarting, N., Sperstad, P.,  
455 Johnson, D. K., and Fehr, A. R. (2021) Unique mutations in the MHV macrodomain  
456 differentially attenuate virus replication, indicating multiple roles for the macrodomain in  
457 coronavirus replication. *Journal of Virology*, JVI. 00766-00721
- 458 22. Abraham, R., Hauer, D., McPherson, R. L., Utt, A., Kirby, I. T., Cohen, M. S., Merits,  
459 A., Leung, A. K. L., and Griffin, D. E. (2018) ADP-ribosyl-binding and hydrolase  
460 activities of the alphavirus nsP3 macrodomain are critical for initiation of virus  
461 replication. *Proc Natl Acad Sci U S A* **115**, E10457-E10466
- 462 23. Abraham, R., McPherson, R. L., Dasovich, M., Badiie, M., Leung, A. K. L., and Griffin,  
463 D. E. (2020) Both ADP-Ribosyl-Binding and Hydrolase Activities of the Alphavirus  
464 nsP3 Macrodomain Affect Neurovirulence in Mice. *mBio* **11**
- 465 24. McPherson, R. L., Abraham, R., Sreekumar, E., Ong, S. E., Cheng, S. J., Baxter, V. K.,  
466 Kistemaker, H. A., Filippov, D. V., Griffin, D. E., and Leung, A. K. (2017) ADP-  
467 ribosylhydrolase activity of Chikungunya virus macrodomain is critical for virus  
468 replication and virulence. *Proc Natl Acad Sci U S A* **114**, 1666-1671
- 469 25. Li, C., Debing, Y., Jankevicius, G., Neyts, J., Ahel, I., Coutard, B., and Canard, B. (2016)  
470 Viral Macro Domains Reverse Protein ADP-Ribosylation. *J Virol* **90**, 8478-8486
- 471 26. Parvez, M. K. (2015) The hepatitis E virus ORF1 'X-domain' residues form a putative  
472 macrodomain protein/Appr-1"-pase catalytic-site, critical for viral RNA replication. *Gene*  
473 **566**, 47-53

- 474 27. Schuller, M., Correy, G. J., Gahbauer, S., Fearon, D., Wu, T., Díaz, R. E., Young, I. D.,  
475 Martins, L. C., Smith, D. H., and Schulze-Gahmen, U. (2021) Fragment binding to the  
476 Nsp3 macrodomain of SARS-CoV-2 identified through crystallographic screening and  
477 computational docking. *Science advances* **7**, eabf8711
- 478 28. Virdi, R. S., Bavisotto, R. V., Hopper, N. C., Vuksanovic, N., Melkonian, T. R., Silvaggi,  
479 N. R., and Frick, D. N. (2020) Discovery of drug-like ligands for the Mac1 domain of  
480 SARS-CoV-2 Nsp3. *SLAS DISCOVERY: Advancing the Science of Drug Discovery* **25**,  
481 1162-1170
- 482 29. Russo, L. C., Tomasin, R., Matos, I. A., Manucci, A. C., Sowa, S. T., Dale, K., Caldecott,  
483 K. W., Lehtiö, L., Schechtman, D., and Meotti, F. C. (2021) The SARS-CoV-2 Nsp3  
484 macrodomain reverses PARP9/DTX3L-dependent ADP-ribosylation induced by  
485 interferon signalling. *bioRxiv*
- 486 30. Sowa, S. T., Galera-Prat, A., Wazir, S., Alanen, H. I., Maksimainen, M. M., and Lehtio,  
487 L. (2021) A molecular toolbox for ADP-ribosyl binding proteins. *Cell Rep Methods*,  
488 100121
- 489 31. Schuller, M., Correy, G. J., Gahbauer, S., Fearon, D., Wu, T., Diaz, R. E., Young, I. D.,  
490 Carvalho Martins, L., Smith, D. H., Schulze-Gahmen, U., Owens, T. W., Deshpande, I.,  
491 Merz, G. E., Thwin, A. C., Biel, J. T., Peters, J. K., Moritz, M., Herrera, N., Kratochvil,  
492 H. T., Consortium, Q. S. B., Aimon, A., Bennett, J. M., Brandao Neto, J., Cohen, A. E.,  
493 Dias, A., Douangamath, A., Dunnett, L., Fedorov, O., Ferla, M. P., Fuchs, M. R., Gorrie-  
494 Stone, T. J., Holton, J. M., Johnson, M. G., Krojer, T., Meigs, G., Powell, A. J., Rack, J.  
495 G. M., Rangel, V. L., Russi, S., Skyner, R. E., Smith, C. A., Soares, A. S., Wierman, J.  
496 L., Zhu, K., O'Brien, P., Jura, N., Ashworth, A., Irwin, J. J., Thompson, M. C.,  
497 Gestwicki, J. E., von Delft, F., Shoichet, B. K., Fraser, J. S., and Ahel, I. (2021) Fragment  
498 binding to the Nsp3 macrodomain of SARS-CoV-2 identified through crystallographic  
499 screening and computational docking. *Sci Adv* **7**, eabf8711
- 500 32. Schuller, M., Riedel, K., Gibbs-Seymour, I., Uth, K., Sieg, C., Gehring, A. P., Ahel, I.,  
501 Bracher, F., Kessler, B. M., Elkins, J. M., and Knapp, S. (2017) Discovery of a Selective  
502 Allosteric Inhibitor Targeting Macrodomain 2 of Polyadenosine-Diphosphate-Ribose  
503 Polymerase 14. *ACS Chem Biol* **12**, 2866-2874
- 504 33. Dasovich, M., Zhuo, J., Goodman, J. A., Thomas, A., McPherson, R. L., Jayabalan, A.  
505 K., Busa, V. F., Cheng, S. J., Murphy, B. A., Redinger, K. R., Alhammad, Y. M. O.,  
506 Fehr, A. R., Tsukamoto, T., Slusher, B. S., Bosch, J., Wei, H., and Leung, A. K. L.  
507 (2022) High-Throughput Activity Assay for Screening Inhibitors of the SARS-CoV-2  
508 Mac1 Macrodomain. *ACS Chem Biol* **17**, 17-23
- 509 34. Ekblad, T., Verheugd, P., Lindgren, A. E., Nyman, T., Elofsson, M., and Schuler, H.  
510 (2018) Identification of Poly(ADP-Ribose) Polymerase Macrodomain Inhibitors Using an  
511 AlphaScreen Protocol. *SLAS Discov* **23**, 353-362
- 512 35. Alhammad, Y. M. O., Kashipathy, M. M., Roy, A., Gagne, J. P., McDonald, P., Gao, P.,  
513 Nonfoux, L., Battaile, K. P., Johnson, D. K., Holmstrom, E. D., Poirier, G. G., Lovell, S.,  
514 and Fehr, A. R. (2021) The SARS-CoV-2 Conserved Macrodomain Is a Mono-ADP-  
515 Ribosylhydrolase. *J Virol* **95**
- 516 36. Sowa, S. T., Galera-Prat, A., Wazir, S., Alanen, H. I., Maksimainen, M. M., and Lehtio,  
517 L. (2022) Preparation of screening assays for ADP-ribosyl readers and erasers using the  
518 GAP-tag as a binding probe. *STAR Protoc* **3**, 101147

- 519 37. Dasovich, M., Zhuo, J., Goodman, J. A., Thomas, A. G., McPherson, R. L., Jayabalan, A.  
520 K., Busa, V. F., Cheng, S. J., Murphy, B. A., Redinger, K. R., Alhammad, Y. M. O.,  
521 Fehr, A. R., Tsukamoto, T., Slusher, B., Bosch, J., Wei, H., and Leung, A. K. L. (2022)  
522 High-throughput Activity Assay for Screening Inhibitors of the SARS-CoV-2 Mac1  
523 Macrodomein. *ACS Chem Biol*
- 524 38. Capobianco, A. J., Schürer, S. C., Zhu, X., and Kelley, T. T. (2021) Inhibitors of the  
525 notch transcriptional activation complex kinase ("nack") and methods for use of the  
526 same. Google Patents
- 527 39. Frick, D. N., Viridi, R. S., Vuksanovic, N., Dahal, N., and Silvaggi, N. R. (2020)  
528 Molecular Basis for ADP-Ribose Binding to the Mac1 Domain of SARS-CoV-2 nsp3.  
529 *Biochemistry* **59**, 2608-2615
- 530 40. Schuller, M., Correy, G. J., Gahbauer, S., Fearon, D., Wu, T., Diaz, R. E., Young, I. D.,  
531 Carvalho Martins, L., Smith, D. H., Schulze-Gahmen, U., Owens, T. W., Deshpande, I.,  
532 Merz, G. E., Thwin, A. C., Biel, J. T., Peters, J. K., Moritz, M., Herrera, N., Kratochvil,  
533 H. T., Consortium, Q. S. B., Aimon, A., Bennett, J. M., Brandao Neto, J., Cohen, A. E.,  
534 Dias, A., Douangamath, A., Dunnett, L., Fedorov, O., Ferla, M. P., Fuchs, M. R., Gorrie-  
535 Stone, T. J., Holton, J. M., Johnson, M. G., Krojer, T., Meigs, G., Powell, A. J., Rack, J.  
536 G. M., Rangel, V. L., Russi, S., Skyner, R. E., Smith, C. A., Soares, A. S., Wierman, J.  
537 L., Zhu, K., O'Brien, P., Jura, N., Ashworth, A., Irwin, J. J., Thompson, M. C.,  
538 Gestwicki, J. E., von Delft, F., Shoichet, B. K., Fraser, J. S., and Ahel, I. (2021) Fragment  
539 binding to the Nsp3 macrodomain of SARS-CoV-2 identified through crystallographic  
540 screening and computational docking. *Sci Adv* **7**
- 541 41. Friesner, R. A., Banks, J. L., Murphy, R. B., Halgren, T. A., Klicic, J. J., Mainz, D. T.,  
542 Repasky, M. P., Knoll, E. H., Shelley, M., Perry, J. K., Shaw, D. E., Francis, P., and  
543 Shenkin, P. S. (2004) Glide: a new approach for rapid, accurate docking and scoring. 1.  
544 Method and assessment of docking accuracy. *J Med Chem* **47**, 1739-1749
- 545 42. Friesner, R. A., Murphy, R. B., Repasky, M. P., Frye, L. L., Greenwood, J. R., Halgren,  
546 T. A., Sanschagrin, P. C., and Mainz, D. T. (2006) Extra precision glide: docking and  
547 scoring incorporating a model of hydrophobic enclosure for protein-ligand complexes. *J*  
548 *Med Chem* **49**, 6177-6196
- 549 43. Halgren, T. A., Murphy, R. B., Friesner, R. A., Beard, H. S., Frye, L. L., Pollard, W. T.,  
550 and Banks, J. L. (2004) Glide: a new approach for rapid, accurate docking and scoring. 2.  
551 Enrichment factors in database screening. *J Med Chem* **47**, 1750-1759
- 552 44. Jacobson, M. P., Friesner, R. A., Xiang, Z., and Honig, B. (2002) On the role of the  
553 crystal environment in determining protein side-chain conformations. *J Mol Biol* **320**,  
554 597-608
- 555 45. Jacobson, M. P., Pincus, D. L., Rapp, C. S., Day, T. J., Honig, B., Shaw, D. E., and  
556 Friesner, R. A. (2004) A hierarchical approach to all-atom protein loop prediction.  
557 *Proteins* **55**, 351-367
- 558 46. Sastry, G. M., Adzhigirey, M., Day, T., Annabhimoju, R., and Sherman, W. (2013)  
559 Protein and ligand preparation: parameters, protocols, and influence on virtual screening  
560 enrichments. *J Comput Aided Mol Des* **27**, 221-234  
561



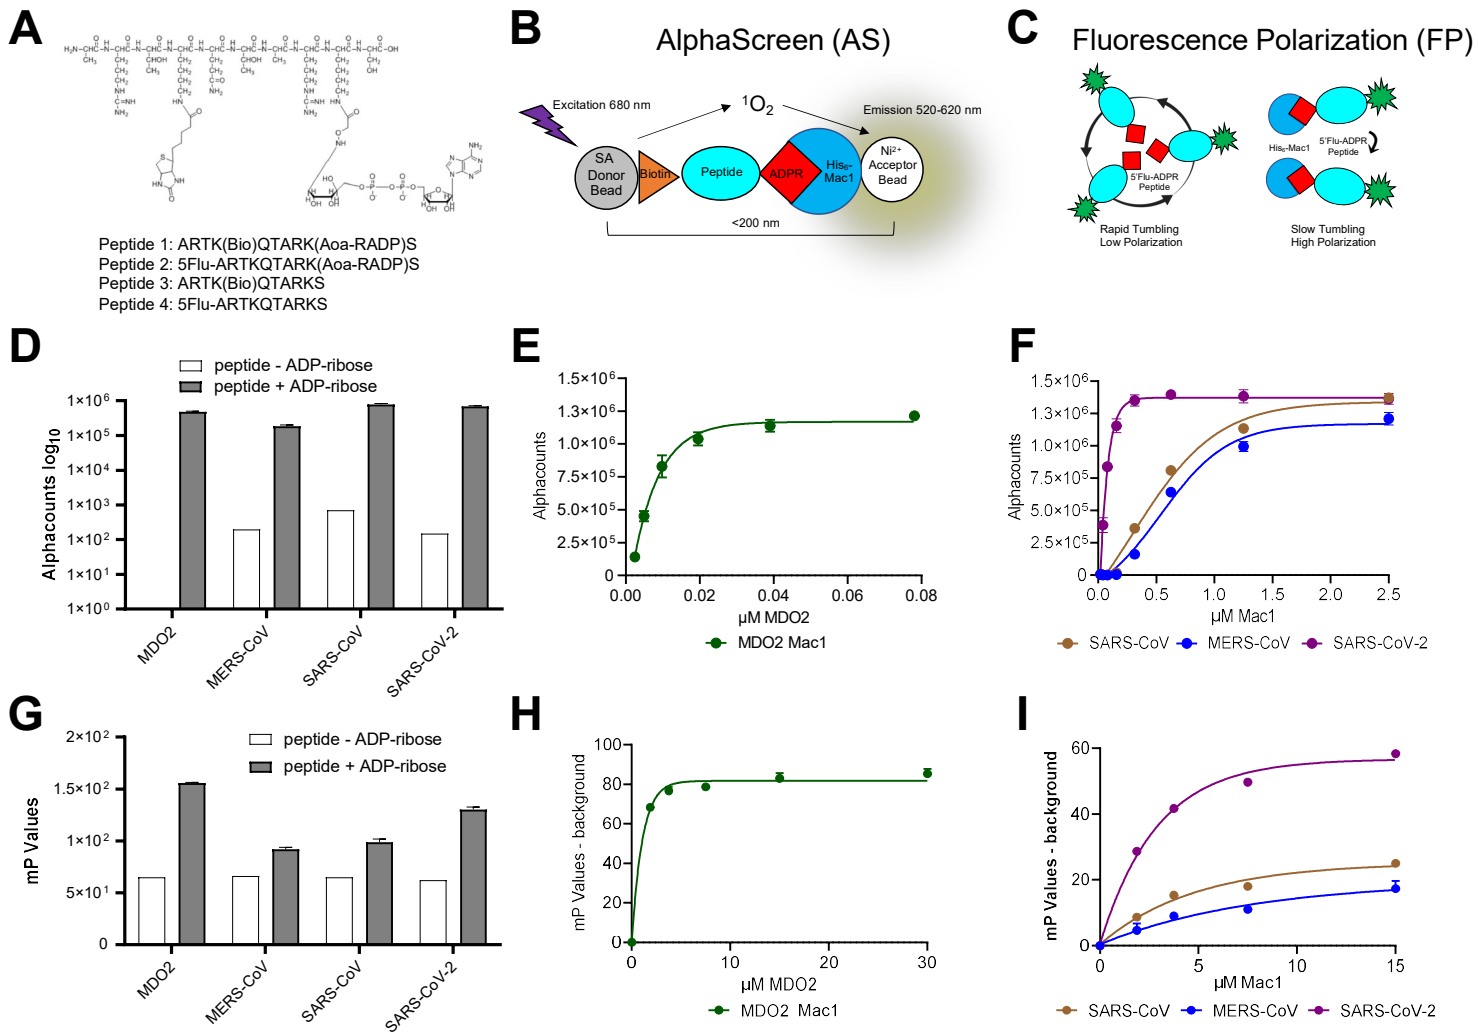

**Figure 1. Coronavirus Mac1 binding to ADP-ribosylated peptides.** A) Illustration of the amino-oxyacetic acid modified lysine-conjugated ADP-ribosylated peptide with an additional biotin conjugated to a different lysine residue and included are the amino acid sequences and modification sites of peptides used in this study. B-C) Cartoon diagrams depicting a bead-based AS (A) and FP (B) assays for measuring macrodomain interactions with an ADP-ribosylated peptide. D) Macrodomain proteins were incubated with peptide #1 or peptide #3 for 1 hour at RT and Alphacounts were determined as described in Methods. E-F) Peptide #1 was incubated with indicated macrodomains at increasing concentrations and Alphacounts were measured as previously described. G) Mac1 proteins were incubated at indicated concentrations with peptide #2 or peptide #4 and the plate was incubated at 25°C for 1 hr before polarization was determined. H-I) Peptide #2 was incubated with indicated macrodomain proteins at increasing concentrations and polarization was determined as previously described. All data represent the means  $\pm$  SD of 2 independent experiments for each protein.

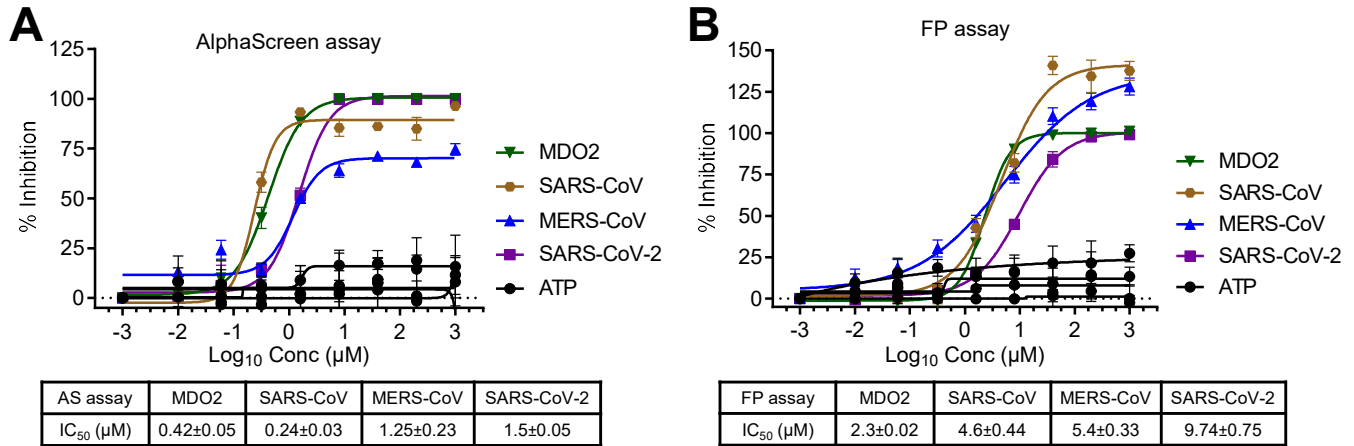

**Figure 2. Free ADP-ribose inhibits macrodomain binding to ADP-ribosylated peptides.** ADP-ribose competition assays were used to block the interaction between macrodomain proteins and ADP-ribosylation peptides in the AS (A) or FP (B) assays. ATP was used as a negative control. The data represent the means  $\pm$  SD of 2 independent experiments for each protein.



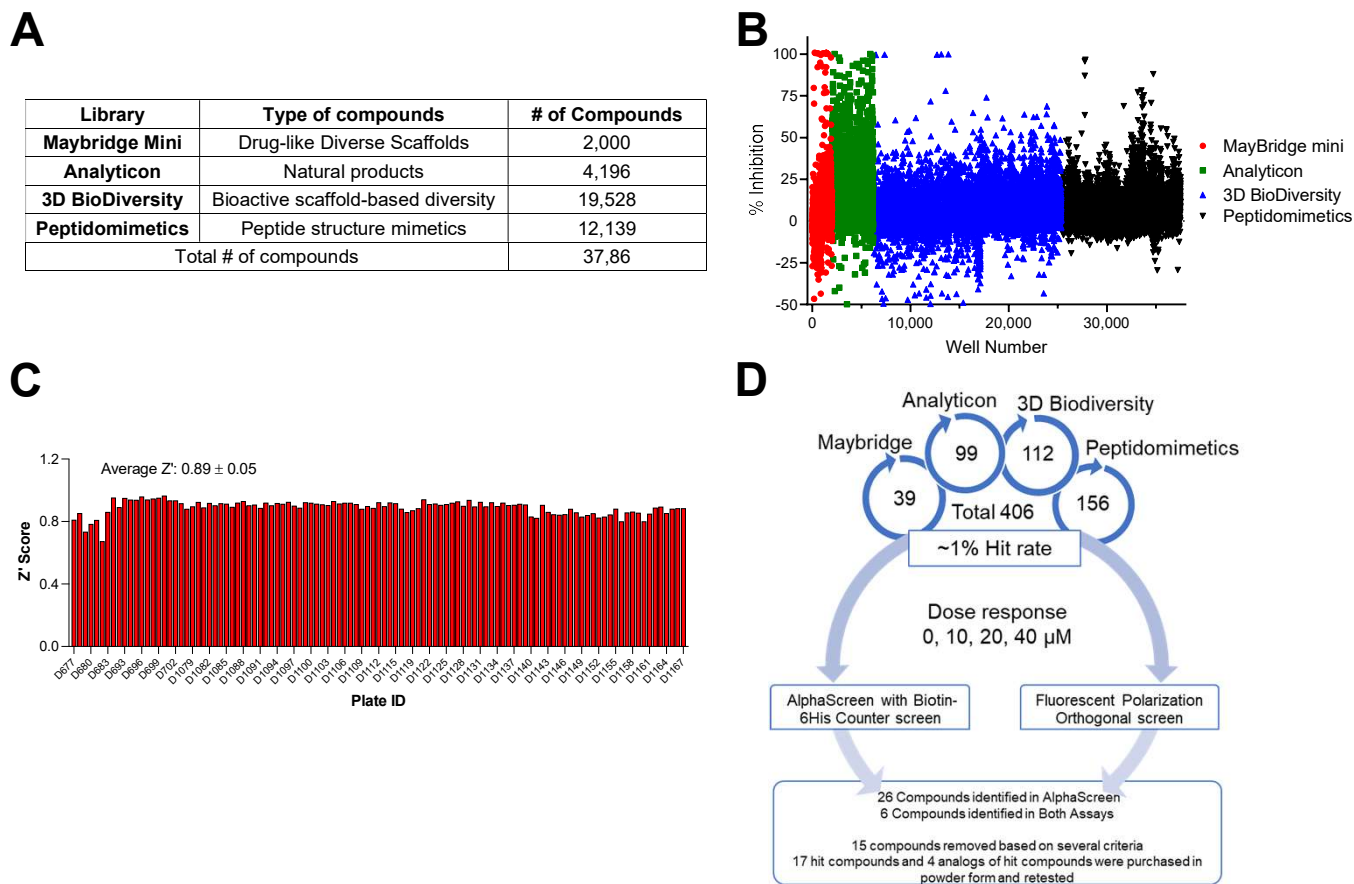

**Figure 3.** High-throughput screen for SARS-CoV-2 Mac1 inhibitors. A) List of libraries that were screened, the number of compounds from each library, and the type of compounds each library contains. B) Scatterplot showing the % inhibition of each compound in the screen. The cutoff for a hit was the plate median + 3 standard deviations. C)  $Z'$  scores were determined for each plate in the screen. The average  $Z'$  score was  $0.89 \pm 0.05$ . D) Dose response confirmation. From the original screen, we identified 406 potential hits, these hits were retested in a dose-response assay on both the AS and FP assays and were also counterscreened against a biotinylated 6His peptide. After these assays and other exclusion criteria, 17 hit compounds and 4 analogs were repurchased or resynthesized.

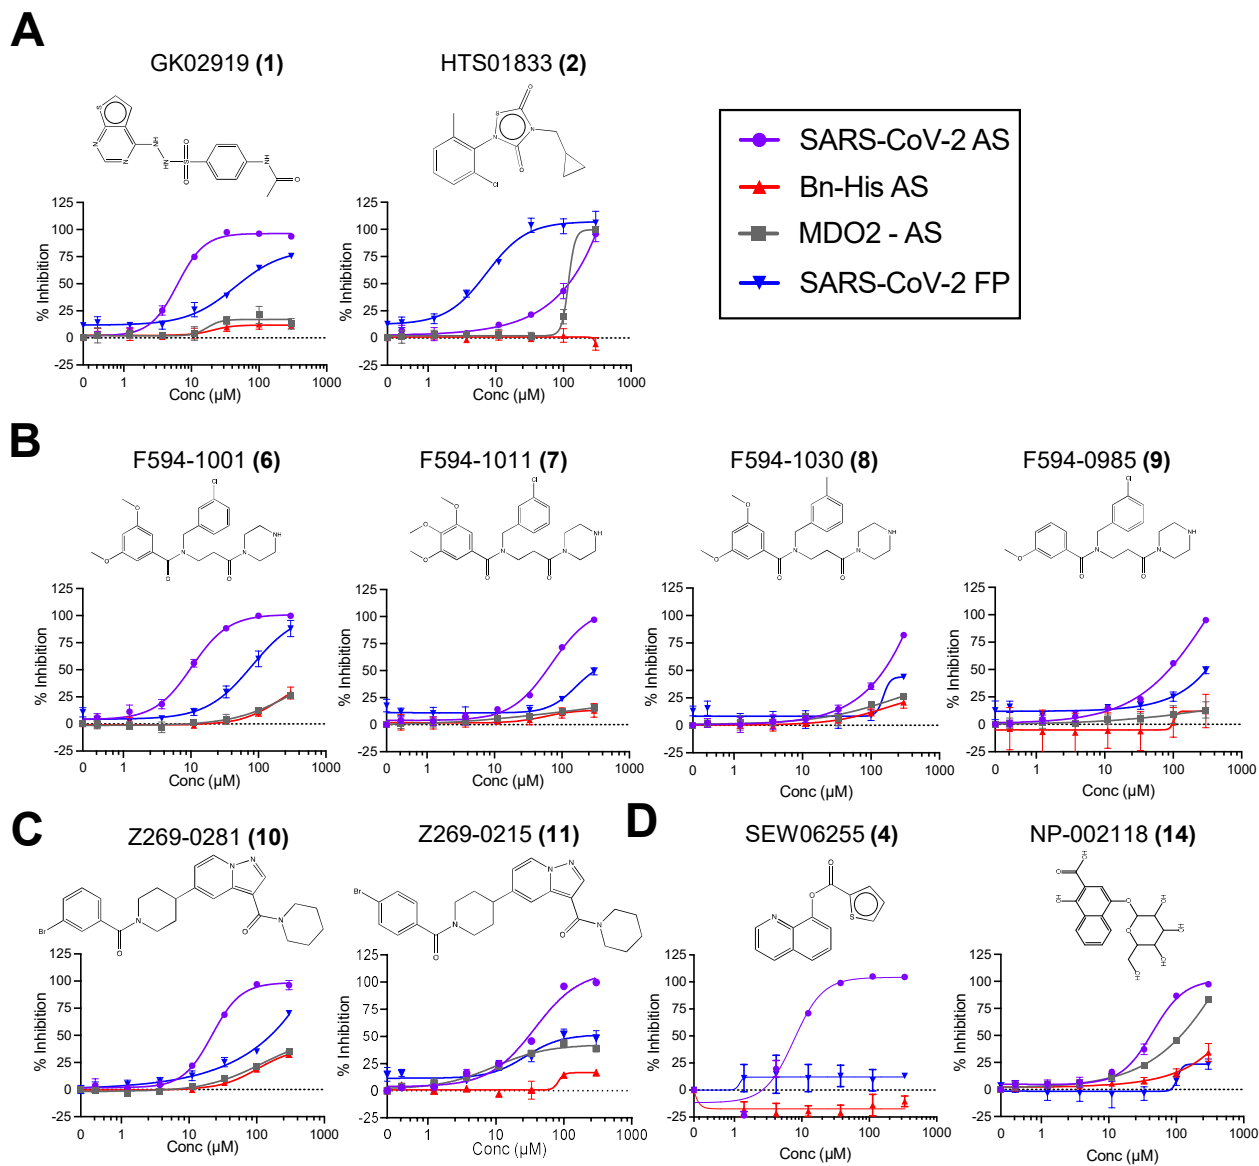

**Figure 4.** Identification of chemical compounds that inhibit SARS-CoV-2 Mac1 ADP-ribose binding. Dose-response curves representing hit compounds identified in the HTS. A) Maybridge Mini Library compounds 1, 2. B) Compound 6 and its analogs, 7, 8, 9. C) Compound 10 and its analog 11. D) Compounds 4 and 14 which did not inhibit FP assay. Data represent the means  $\pm$  SD of at least 2 independent experiments for each protein. Structures were created using ChemDraw.

Table 1: IC<sub>50</sub>s of the selected compounds in AlphaScreen and Fluorescence polarization assays

| Compound Name                    | Structure                                                                           | IC <sub>50</sub> AS SARS-CoV-2 (μM) | IC <sub>50</sub> FP SARS-CoV-2 (μM) | IC <sub>50</sub> AS MDO2 (μM) | IC <sub>50</sub> AS MERS (μM) |
|----------------------------------|-------------------------------------------------------------------------------------|-------------------------------------|-------------------------------------|-------------------------------|-------------------------------|
| ADP-ribose                       |                                                                                     | 1.5 ± 0.05                          | 9.74 ± 0.75                         | 0.42 ± 0.05                   | 1.25 ± 0.23                   |
| Compounds inhibit both AS and FP |                                                                                     |                                     |                                     |                               |                               |
| GK02919 (1)                      | 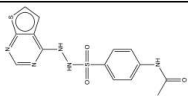   | 6.2 ± 0.6                           | 46.88 ± 8.71                        | NI                            | 39.6 ± 4.2                    |
| HTS01833 (2)                     |    | 104.6 ± 8.4                         | 7.3 ± 1.5                           | 229.6 ± 180.3                 | >300                          |
| F594-1001 (6)                    |    | 10.3 ± 0.8                          | 81.7 ± 12.3                         | NI                            | NI                            |
| F594-1011 (7)                    |    | 70.9 ± 3.5                          | 232.1 ± 118.8                       | NI                            | NI                            |
| Z269-0281 (10)                   |    | 26.7 ± 6.5                          | 75.2 ± 10.6                         | NI                            | 181.3 ± 14.4                  |
| Z269-0215 (11)                   |    | 56.9 ± 33.7                         | 27.6 ± 11.1                         | NI                            | 181.8 ± 4.7                   |
| Compounds inhibit AS only        |                                                                                     |                                     |                                     |                               |                               |
| SEW06255 (4)                     |   | 52 ± 3                              | NI                                  | DND                           | DND                           |
| F594-1030 (8)                    |  | 368.4 ± 144.7                       | NI                                  | NI                            | DND                           |
| F594-0985 (9)                    |  | 78.7 ± 4.3                          | NI                                  | NI                            | DND                           |
| NP-002118 (14)                   |  | 45.2 ± 1.9                          | NI                                  | 82.9 ± 4.6                    | DND                           |

(NI): No Inhibition

(NA): Not Applicable

(DND): Did Not Do

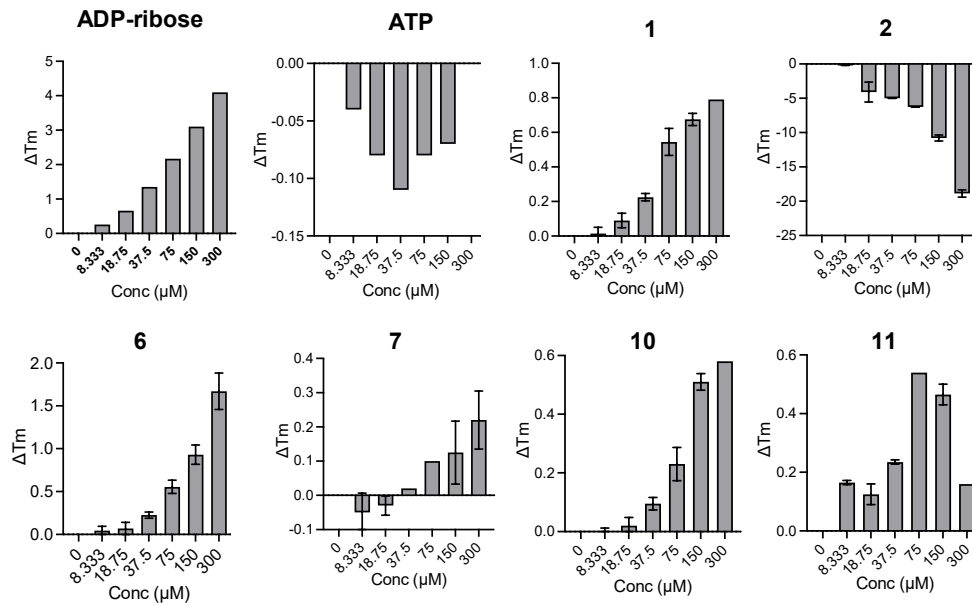

**Figure 5.** Thermal stability of SARS-CoV-2 Mac1 after incubation with hit compounds. The top 6 hit compounds were tested for their ability to increase the thermal stability of SARS-CoV-2 Mac1 in a differential scanning fluorimetry assay (DSF). The data represent the means  $\pm$  SD of the  $\Delta T_m$  from two independent experiments.

Table 2: Peak values of DSF thermal shift temperatures

| Compound               | Peak $\Delta T_m$ |        |      |      |      |      |
|------------------------|-------------------|--------|------|------|------|------|
|                        | 1                 | 2      | 6    | 7    | 10   | 11   |
| Average                | 0.68              | 18.88- | 1.67 | 0.22 | 0.51 | 0.47 |
| SD                     | 0.04              | 0.53   | 0.21 | 0.08 | 0.03 | 0.04 |
| Conc ( $\mu\text{M}$ ) | 150               | 300    | 300  | 300  | 150  | 150  |

**A**

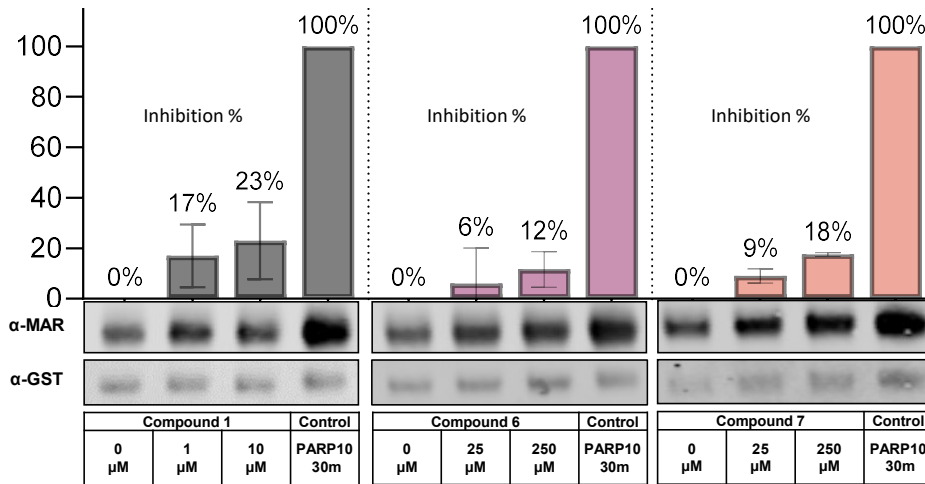

**B**

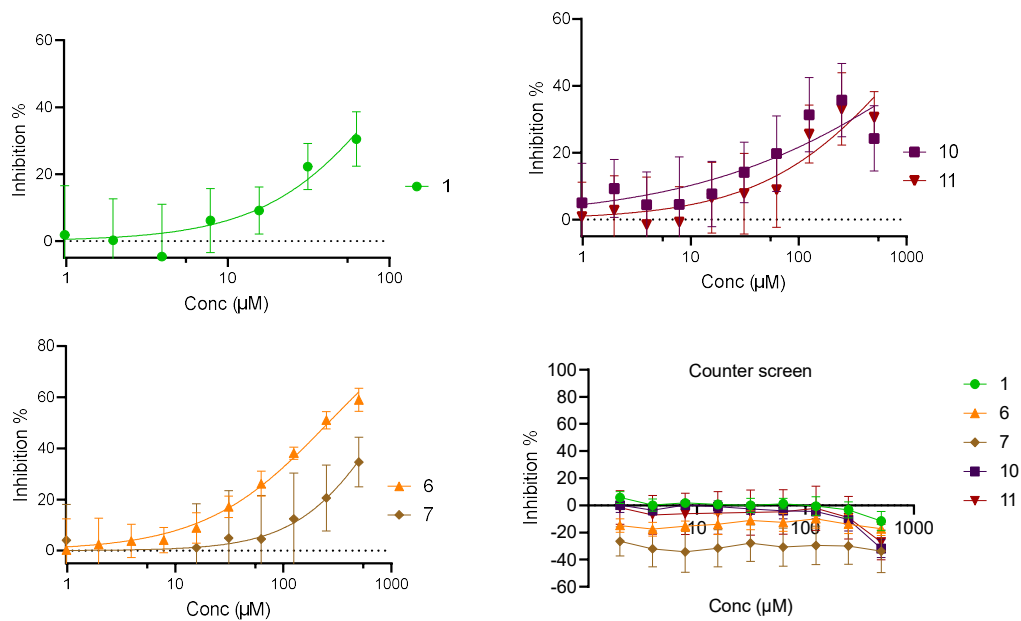

**Figure 6. Impact of hit compounds on SARS-CoV-2 ADP-ribosylhydrolase activity.** A) Compounds were incubated at indicated concentrations for 30 minutes with the SARS-CoV-2 Mac1 protein prior to adding the PARP10 substrate and then were further incubated for 30 minutes. Proteins were analyzed by Immunoblotting with anti-GST (PARP10) and anti-MAR binding reagent (MABE1076). Gels were quantitated using Image Studio software. The bar graph above each immunoblots represent the mean inhibition  $\pm$  SD from at least two independent experiments.

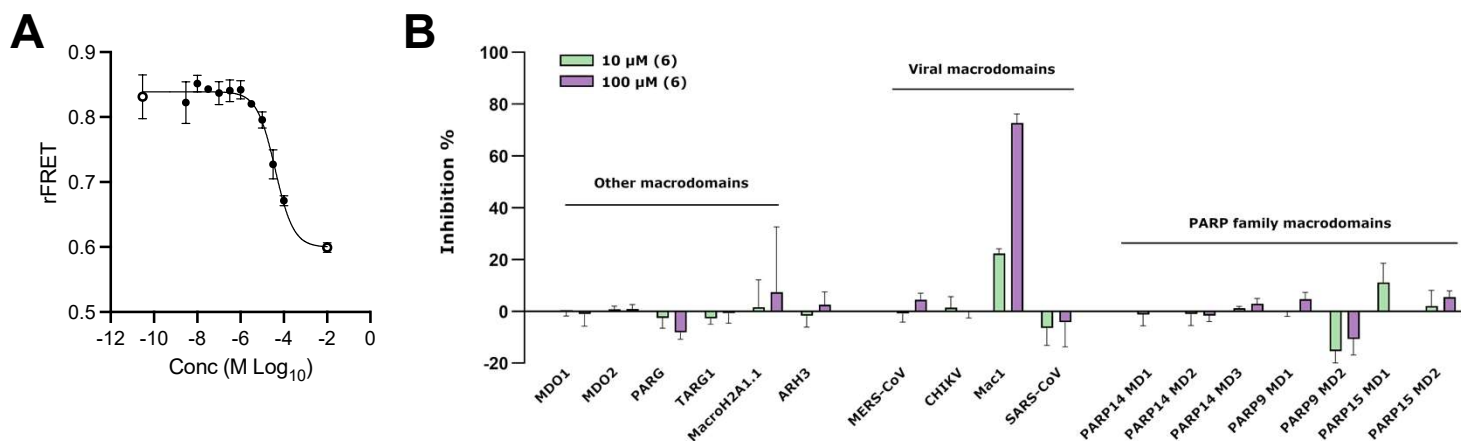

**Figure 7. Compound 6 is highly selective for the SARS-CoV-2 Mac1 protein.** A-B) Compound 6 was tested in a FRET-based assay for its ability to inhibit SARS-CoV-2 Mac1 protein in a dose-dependent manner (A) and for its ability to inhibit a panel of 17 macrodomain containing proteins (B). The data in means  $\pm$  SD are shown as a single experiment representative of 3 independent experiments.

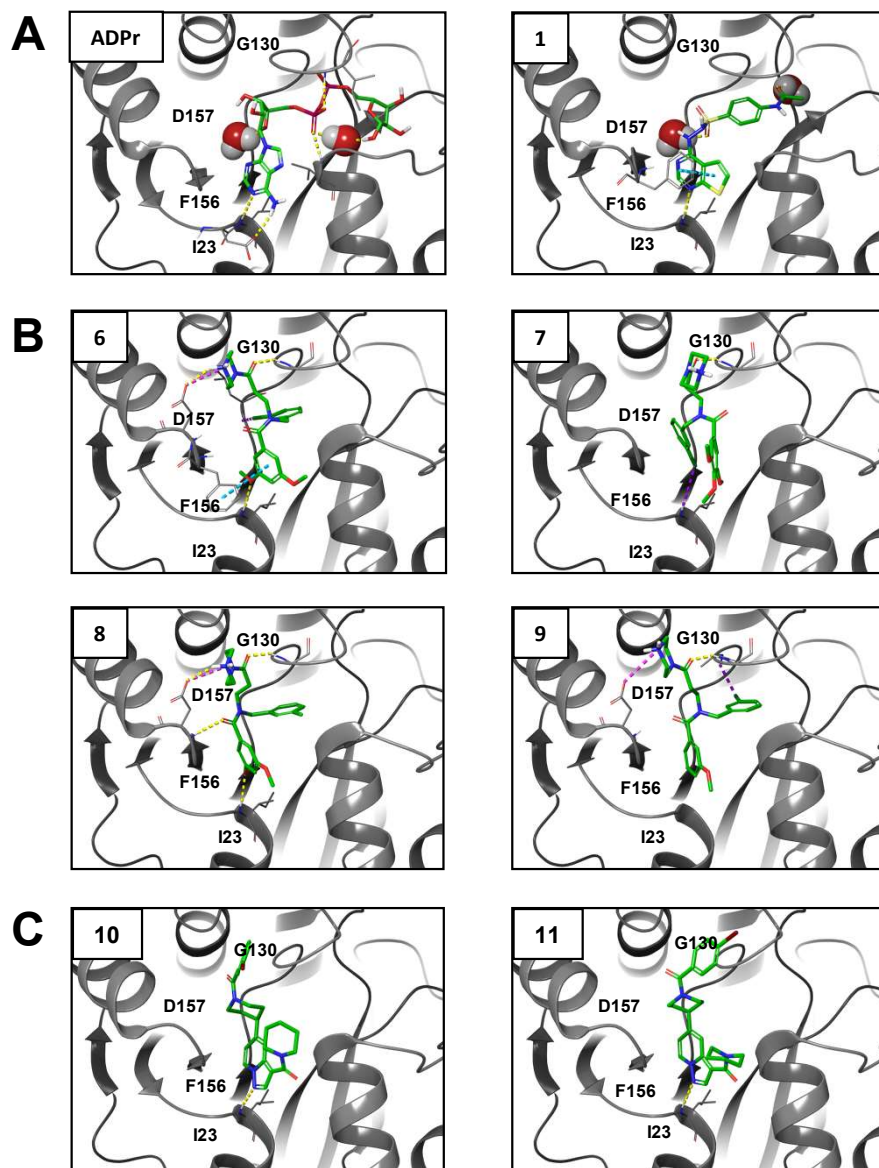

Figure 8. Computational modeling of identified compounds with SARS-CoV-2 Mac1 structures. Indicated compounds were docked and modeled with SARS-CoV-2 Mac1 structures using Maestro Schrödinger software and separated into 3 groups. (A) – Compound 1; (B) Compounds 6, 7, 8, 9; (C) Compounds 10, 11. Yellow lines - hydrogen bonds; Cyan lines - pi-pi interactions; magenta lines – weak hydrogen bonds; and purple lines – halogen bond.



Table S1: Compound docking scores

| <b>Compound #</b> | <b>docking score</b> | <b>glide emodel</b> | <b>Mac1 Structure</b> |
|-------------------|----------------------|---------------------|-----------------------|
| 1                 | -7.857               | -81.695             | 6WOJ                  |
| 6                 | -4.563               | -50.414             | 7RK0                  |
| 7                 | -3.338               | -34.249             | 7RK0                  |
| 8                 | -4.064               | -57.015             | 7RK0                  |
| 9                 | -4.287               | -61.816             | 7RK0                  |
| 10                | -4.806               | -59.941             | 6WEY                  |
| 11                | -5.306               | -58.757             | 6WEY                  |

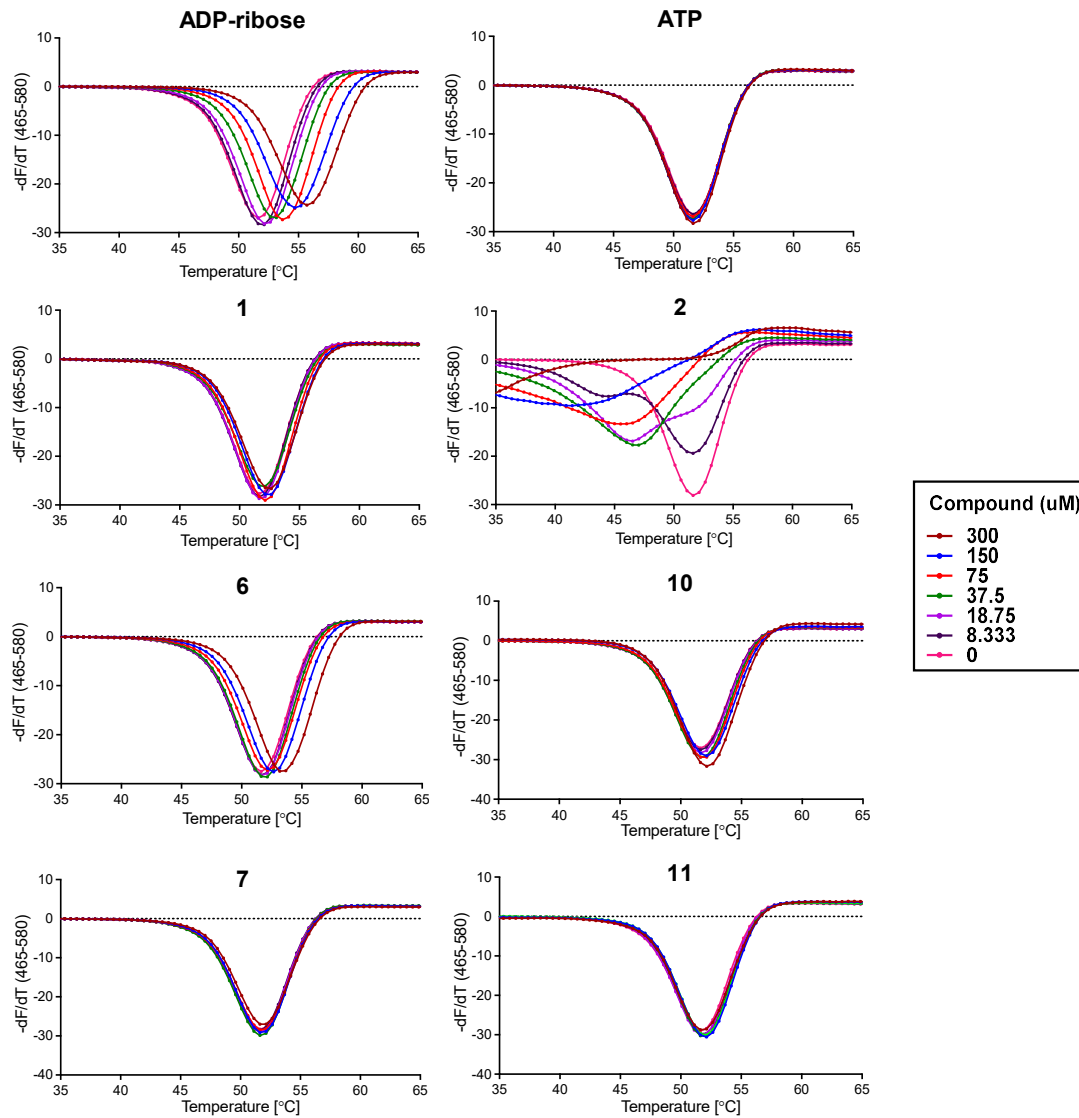

**Figure S1.** Thermal stability of SARS-CoV-2 Mac1 after incubation with hit compounds. The top 4 hit compounds were tested for their ability to increase the thermal stability of SARS-CoV-2 Mac1 in a differential scanning fluorimetry assay (DSF). Thermal profiles are shown for each compound at different concentrations. \

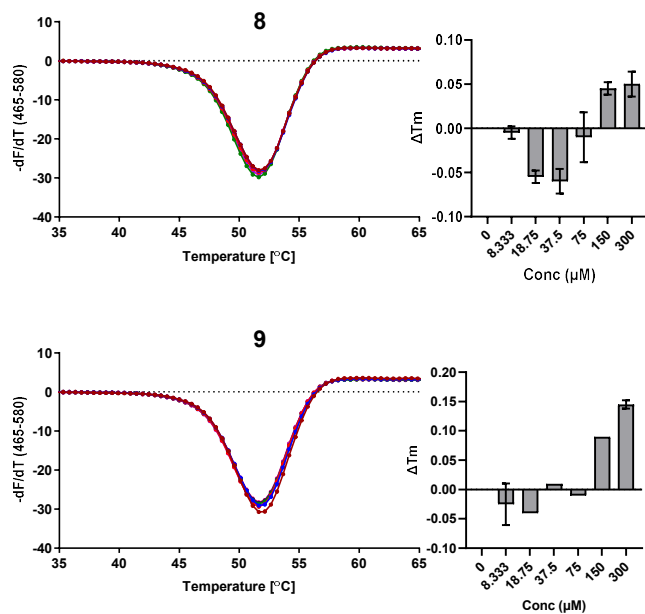

**Figure S2. Thermal stability of SARS-CoV-2 Mac1 after incubation with analog compounds.**

Two analogs of FS2MD-006 are shown here for their ability to increase the thermal stability of SARS-CoV-2 Mac1 in a differential scanning fluorimetry assay (DSF). Thermal profiles and change in  $T_m$  are plotted for each compound at different concentrations.
